# Supplementary material for: Chronic iron exposure and c-Myc/H-ras-mediated transformation in fallopian tube cells alter the expression of EVI1, amplified at 3q26.2 in ovarian cancer
Source: PubMed Central journal article supplement (PMC6704182; doi:10.1038/s41389-019-0154-y), 2019-08-21

Supplementary Figure 1

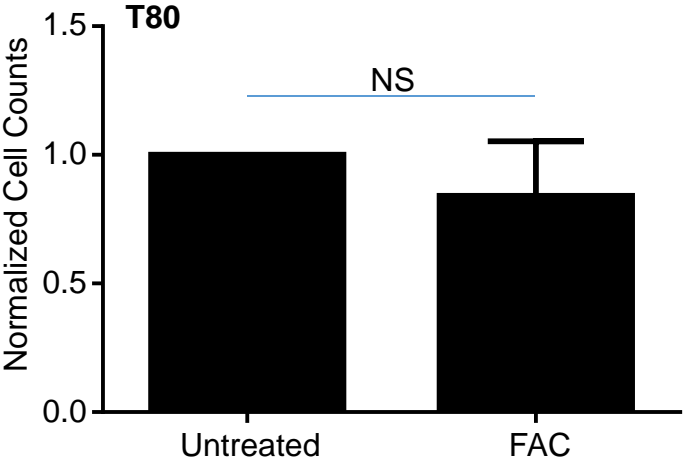

Supplement: 41389_2019_154_MOESM2_ESM.pdf [file 41389_2019_154_MOESM2_ESM.pdf]
